# Supplementary material for: Repurposing clemastine to target glioblastoma cell stemness
Source: bioRxiv or medRxiv preprint supplement (doi:10.1101/2022.11.05.515291), 2022-12-13
Supplement: Supplementary file [file media-2.pdf]

| RT-qPCR primer sequences: |                               |                        |
|---------------------------|-------------------------------|------------------------|
| Gene name                 | Forward (F)<br>or Reverse (R) | Sequence (5' to 3')    |
| <i>ACTB</i>               | F                             | GATTCCTATGTGGGCGACGA   |
|                           | R                             | AGGTCTCAAACATGATCTGGGT |
| <i>B2M</i>                | F                             | TGCCGTGTGAACCATGTG     |
|                           | R                             | ACCTCCATGATGCTGCTTACA  |
| <i>NES</i>                | F                             | CTGGAGCAGGAGAAACAGGG   |
|                           | R                             | GAGGGAAGTCTTGGAGCCAC   |
| <i>SOX2</i>               | F                             | AACGGCAGCTACAGCATGAT   |
|                           | R                             | GACTTGACCACCGAACCCAT   |
| <i>PDGFRA</i>             | F                             | GACGGTCTTGAAGTGAGCA    |
|                           | R                             | TAAAGCCCTGTCTGCTGTCG   |
| <i>CSPG4</i>              | F                             | GGGCCGTTCTCTATAGCCAC   |
|                           | R                             | GACACCATCACCAGGTAGCC   |
| <i>OLIG2</i>              | F                             | AGTGGCTTCAAGTCATCCTCG  |
|                           | R                             | TGTTGATCTTGAGACGCAGCT  |
| <i>DLL3</i>               | F                             | TAGCGCTCATTTTCCTCCCC   |
|                           | R                             | TGGATCTGCAGCTCGAAGAC   |
| <i>PTPRZ1</i>             | F                             | GCAGTTGGATGGAGAGGACC   |
|                           | R                             | TCGACAATCAGTTGGTCGCT   |
| <i>CSPG5</i>              | F                             | GAGCTTCTAGTGCCCACTGG   |
|                           | R                             | CATCCCCTTGTGCCAGATGT   |
| <i>NOTCH1</i>             | F                             | CAGATCCTGATCCGGAACCG   |
|                           | R                             | CCAGAAACAGGGGTGTCTCC   |
| <i>NCAN</i>               | F                             | GTGTCACTGCCTTCCTACCC   |
|                           | R                             | TGCAATGATGGCTGAGCTGA   |
| <i>MOG</i>                | F                             | AGGGAAAGGTGACTCTCAGGA  |
|                           | R                             | GGAAGATGAGGCCAACAGTGA  |
| <i>ERBB3</i>              | F                             | TGAATGGCCTGAGTGTGACC   |
|                           | R                             | ATCGTAGACCTGGGTCCCTC   |
| <i>EBP</i>                | F                             | TACTGGCTGGCCTCTTCTCT   |
|                           | R                             | CCCAGGATGTATCGGCTGTC   |
| <i>Actb</i>               | F                             | GGTGGGAATGGGTCAGAAGG   |
|                           | R                             | GTACATGGCTGGGGTGTTGA   |
| <i>B2m</i>                | F                             | TTTCAGTGGCTGCTACTCGG   |
|                           | R                             | TGTTCGGCTTCCCATTCTCC   |

|            |   |                      |
|------------|---|----------------------|
| <i>Ebp</i> | F | ATCGAGGGCTGGTTCTCTCT |
|            | R | GCCCATAGACACCACAAGCT |

| <b>shRNA sequences:</b> |                |                                                                 |
|-------------------------|----------------|-----------------------------------------------------------------|
| Name                    | Clone ID       | Sequence (5' to 3')                                             |
| <i>EBP</i> #1 (human)   | TRCN0000049393 | CCGG-GCACCTAAGACTGGACAACCTT-CTCGAG-AAGTTGTCCAGTCTTAGGTGC-TTTTTG |
| <i>EBP</i> #2 (human)   | TRCN0000049394 | CCGG-CTCCGCTTCATTCTACAGCTT-CTCGAG-AAGCTGTAGAATGAAGCGGAG-TTTTTG  |
| <i>Ebp</i> #1 (mouse)   | TRCN0000111870 | CCGG-CCAGAAGACTCAAATCTTCTT-CTCGAG-AAGAAGATTTGAGTCTTCTGG-TTTTTG  |
| <i>Ebp</i> #2 (mouse)   | TRCN0000111872 | CCGG-CCAAGGGAGATAGCCGATATA-CTCGAG-TATATCGGCTATCTCCCTTGG-TTTTTG  |
| Non-targeting control   | SHC002         | CCGG-CAACAAGATGAAGAGCACCAA-CTCGAG-TTGGTGCTTTCATCTTGTTG-TTTTTG   |

| <b>sgRNA sequences:</b>    |                               |                           |
|----------------------------|-------------------------------|---------------------------|
| Name                       | Forward (F)<br>or Reverse (R) | Sequence (5' to 3')       |
| sg- <i>HRH1</i> -exon2-F1  | F                             | CACCGTACATCGTCAGCCTCTCGG  |
| sg- <i>HRH1</i> -exon2-R1  | R                             | AAACCCGAGAGGCTGACGATGTAC  |
| sg- <i>HRH1</i> -exon2-F2  | F                             | CACCGCAGACCTCGGTGCGCCGAG  |
| sg- <i>HRH1</i> -exon2-R2  | R                             | AAACCTCGGCGCACCGAGGTCTGC  |
| sg- <i>CHRM3</i> -exon5-F1 | F                             | CACCGGGTCATCGGTGGTACCGTC  |
| sg- <i>CHRM3</i> -exon5-R1 | R                             | AAACGACGGTACCACCGATGACCC  |
| sg- <i>CHRM3</i> -exon5-F2 | F                             | CACCGAAATGAGTGACGGTTCCCG  |
| sg- <i>CHRM3</i> -exon5-R2 | R                             | AAACCGGGAACCGTCACTCATTTTC |
| sgRNA-control-F            | F                             | CACCGTAGGCGCGCCGCTCTCTAC  |
| sgRNA-control-R            | R                             | AAACGTAGAGAGCGGCGCGCCTAC  |

| <b>PCR primer sequences:</b> |                               |                                             |
|------------------------------|-------------------------------|---------------------------------------------|
| Name                         | Forward (F)<br>or Reverse (R) | Sequence (5' to 3')                         |
| PCR- <i>HRH1</i> -F1         | F                             | GGTCACAGTAGGGCTCAACC                        |
| PCR- <i>HRH1</i> -R1         | R                             | CACCACCAGCATCTTTTGGC                        |
| PCR-M13F- <i>CHRM3</i> -F1   | F                             | TGTA AACGACGGCCAGTCCCCCAGACTATGTCA<br>GAGAG |

|                            |     |                                             |
|----------------------------|-----|---------------------------------------------|
| PCR-M13F- <i>CHRM3</i> -R1 | R   | CAGGAAACAGCTATGACCCTAAGGCCCATCGATT<br>CATGA |
| pLentiCRISPR-R1            | N/A | CCCGTTGCGAAAAAGAACGT                        |

| <b>EBP mutagenesis primer sequences:</b> |                               |                                   |
|------------------------------------------|-------------------------------|-----------------------------------|
| EBP mutation                             | Forward (F)<br>or Reverse (R) | Sequence (5' to 3')               |
| E80K                                     | F                             | CATTCACCTGGTGATCAAGGGCTGGTTCGTTCT |
|                                          | R                             | AGAACGAACCAGCCCTTGATCACCAGGTGAATG |
| R147H                                    | F                             | GCCAGCATCCCCTCCACTTCATTCTACAGCT   |
|                                          | R                             | AGCTGTAGAATGAAGTGGAGGGGATGCTGGC   |
| W196S                                    | F                             | GTCTTCATGAATGCCCTGTCGCTGGTGCTG    |
|                                          | R                             | CAGCACCAGCGACAGGGCATTTCATGAAGAC   |

| <b>Plasmids:</b>                           |           |             |  |
|--------------------------------------------|-----------|-------------|--|
| Name                                       | Provider  | Cat. Number |  |
| pcDNA3.1 V5-His A                          | GenScript | N/A         |  |
| pcDNA3.1 <sup>+</sup> C-(K)-DYK-hEBP       | GenScript | OHu18817    |  |
| pcDNA3.1 <sup>+</sup> C-(K)-DYK-hEBP-E80K  | This lab  | N/A         |  |
| pcDNA3.1 <sup>+</sup> C-(K)-DYK-hEBP-R147H | This lab  | N/A         |  |
| pcDNA3.1 <sup>+</sup> C-(K)-DYK-hEBP-W196S | This lab  | N/A         |  |
| EGFP-hGal3                                 | Addgene   | 73080       |  |
| PM-GFP                                     | Addgene   | 21213       |  |
| LentiCRISPRv2E                             | Addgene   | 78852       |  |

| <b>Chemical compounds:</b> |               |             |
|----------------------------|---------------|-------------|
| Name                       | Vendor        | Cat. Number |
| Clemastine (fumarate)      | Cayman        | 14637       |
| Lathosterol                | Cayman        | 9003102     |
| Cholesterol-water soluble  | Sigma-Aldrich | C4951       |
| Tamoxifen                  | Sigma-Aldrich | T5648       |
| Puromycin dihydrochloride  | Sigma-Aldrich | P8833       |
| Dimethyl sulfoxide         | Sigma-Aldrich | D2650-100ML |
| Ascorbic acid              | Lonza         | CC-4398     |
| Geneticin (G418 Sulfate)   | ThermoFisher  | 10131035    |
| CW3388                     | Sigma-Aldrich | SML2602     |
| Polybrene                  | Sigma-Aldrich | TR-1003     |

|                                 |                |             |
|---------------------------------|----------------|-------------|
| TASIN-1                         | Cayman         | 21155       |
| Cetirizine                      | Cayman         | 19686       |
| Fexofenadine                    | Cayman         | 18191       |
| D-luciferin, sodium salt        | Goldbio        | LUCNA-1     |
| 2-Mercaptoethanol               | Sigma-Aldrich  | M7522-100ML |
| Tween 20                        | BIO-RAD        | 1706531     |
| Methanol                        | VWR            | BDH1135-4LP |
| Ethanol absolute                | VWR            | 89125-172   |
| Isoflurane                      | Patterson      | 07-893-8441 |
| DAPI                            | MilliporeSigma | D9542-10MG  |
| Fluphenazine (hydrochloride)    | Cayman         | 23555       |
| Perphenazine                    | Cayman         | 20735       |
| Trifluoperazine (hydrochloride) | Cayman         | 15068       |
| Raloxifene (hydrochloride)      | Cayman         | 10011620    |
| Benzotropine (mesylate)         | Cayman         | 16214       |
| Saponin                         | MilliporeSigma | 84510-100G  |

| <b>Reagents and kits:</b>                              |                |             |
|--------------------------------------------------------|----------------|-------------|
| Name                                                   | Vendor         | Cat. Number |
| Human PDGF-AA                                          | Shenandoah     | 100-16      |
| Human PDGF-BB                                          | Shenandoah     | 100-18      |
| Laminin                                                | MilliporeSigma | L2020       |
| Triton X-100 solution                                  | Fluka          | 93443       |
| Formalin 10%, neutral buffered                         | VWR            | 89370-094   |
| Pierce™ 16% Formaldehyde (w/v),<br>Methanol-free       | ThermoFisher   | 28908       |
| Ponceau S solution                                     | Sigma-Aldrich  | P7170       |
| Nitrocellulose Membrane, 0.45um; Roll<br>30 cm x 3.5 m | Bio-Rad        | 1620115     |

|                                                                     |                   |                     |
|---------------------------------------------------------------------|-------------------|---------------------|
| Trans-Blot Turbo RTA Mini 0.2 µm Nitrocellulose Transfer Kit        | Bio-Rad           | 1704270             |
| NuPAGE 4-12% Bis-Tris Protein Gels, 1.0mm, 12 well                  | ThermoFisher      | NP0322BOX           |
| NuPAGE 4-12% Bis-Tris Protein Gels, 1.0mm, 10 well                  | ThermoFisher      | NP0321BOX           |
| NuPAGE 4-12% Bis-Tris Protein Gels, 1.5mm, 15 well                  | ThermoFisher      | NP0336BOX           |
| NuPAGE 4-12% Bis-Tris Protein Gels, 1.5mm, 10 well                  | ThermoFisher      | NP0335BOX           |
| Mini Gel Tank                                                       | ThermoFisher      | A25977              |
| RNA to cDNA EcoDry™ Premix (Double Primed)                          | Takara (Clontech) | 639548              |
| KAPA SYBR FAST qPCR Master Mix (2X)                                 | Roche             | KK4602              |
| SuperSignal™ West Pico PLUS Chemiluminescent Substrate              | ThermoFisher      | 34580               |
| Pierce™ BCA Protein Assay Kit                                       | ThermoFisher      | 23225               |
| Accutase solution                                                   | MilliporeSigma    | A6964-500ML         |
| Corning 96-well Clear Flat Bottom Polystyrene TC-treated Microplate | Corning           | 3595                |
| Quick-RNA miniprep kit                                              | Genesee           | 11-328 (Zymo R1055) |
| UltraPure DNase/RNase-Free Distilled Water                          | ThermoFisher      | 10977015            |
| Dulbecco's Phosphate Buffered Saline                                | MilliporeSigma    | D8537-500ML         |
| PBS, pH 7.4                                                         | ThermoFisher      | 10010023            |
| DPBS, no calcium, no magnesium                                      | ThermoFisher      | 14190144            |
| 4X Laemmli Sample Buffer                                            | BIO-RAD           | 1610747             |
| Trypan Blue Solution (0.4%)                                         | Sigma-Aldrich     | T8154               |
| Opti-MEM™ I Reduced Serum Medium                                    | ThermoFisher      | 31985070            |
| McCoy's 5A (Modified) Medium                                        | ThermoFisher      | 16600082            |
| Trypsin (2.5%), no phenol red                                       | ThermoFisher      | 15090046            |
| Lipofectamine 3000 Transfection Reagent                             | ThermoFisher      | L3000008            |
| Bovine Serum Albumin                                                | Sigma-Aldrich     | A9647-100G          |
| Restore Western Blot Stripping Buffer                               | ThermoFisher      | 21059               |
| NuPAGE MOPS SDS Running Buffer (20X)                                | ThermoFisher      | NP0001              |

|                                                          |                |            |
|----------------------------------------------------------|----------------|------------|
| NuPAGE Antioxidant                                       | ThermoFisher   | NP0005     |
| Corning 1L 10X Tris Buffered Saline                      | Corning        | 46-012-CM  |
| 10x Tris Buffered Saline (TBS)                           | BIO-RAD        | 1706435    |
| ProLong Gold Antifade Mountant                           | ThermoFisher   | P36934     |
| SlowFade Diamond Antifade Mountant                       | ThermoFisher   | S36972     |
| FxCycle™ PI/RNase Staining Solution                      | ThermoFisher   | F10797     |
| S.O.C. Medium                                            | ThermoFisher   | 15544034   |
| TempPlate full-skirted 96-well PCR plate                 | USA Scientific | 1402-9800  |
| Precision Plus Protein Dual Color Standards              | BIO-RAD        | 1610374    |
| 50x TAE (Tris/Acetic Acid/EDTA) Buffer, 1 L              | BIO-RAD        | 1610743    |
| Non-fat dry milk                                         | Genesee        | 20-241     |
| Goat serum                                               | MilliporeSigma | G9023-10ML |
| QuikChange Lightning Multi Site-Directed Mutagenesis Kit | Agilent        | 210519     |
| ZymoPURE Plasmid Miniprep Kit                            | Genesee        | 11-553     |
| Neon Transfection System 10 µL Kit                       | ThermoFisher   | MPK1025    |

| <b>Equipment:</b>                                                              |              |             |
|--------------------------------------------------------------------------------|--------------|-------------|
| Name                                                                           | Vendor       | Cat. Number |
| Bioruptor Standard                                                             | Diagenode    | UCD-200     |
| CFX96 Real-Time PCR Detection System                                           | BIO-RAD      | N/A         |
| Nunc Lab-Tek II Chamber Slide System - 2-well Chamber Slide w/ removable wells | ThermoFisher | 154461      |
| PowerPac Basic Power Supply                                                    | BIO-RAD      | 1645050     |
| Trans-Blot Turbo Transfer System                                               | BIO-RAD      | 1704150     |
| ChemiDoc MP System                                                             | BIO-RAD      | 1708280     |

| <b>Antibody:</b>       |                |             |             |                       |                 |
|------------------------|----------------|-------------|-------------|-----------------------|-----------------|
| Name                   | Vendor         | Cat. Number | RRID        | Dilution for blotting | Dilution for IF |
| Nestin                 | MilliporeSigma | ABD69       | AB_2744681  |                       | <b>1:500</b>    |
| SOX2                   | Cell Signaling | 3579S       | AB_2195767  | <b>1:1000</b>         | <b>1:400</b>    |
| PDGF receptor $\alpha$ | Cell Signaling | 3174S       | AB_2162345  | <b>1:1000</b>         |                 |
| PDGF receptor $\alpha$ | Cell Signaling | 5241S       | AB_10692773 |                       | <b>1:400</b>    |

|                                                   |                |            |             |               |                       |
|---------------------------------------------------|----------------|------------|-------------|---------------|-----------------------|
| CSPG4                                             | Cell Signaling | 43916S     | N/A         |               | <b>1:200</b>          |
| OLIG2                                             | Novus          | NBP1-28667 | AB_1914109  | <b>1:3000</b> | <b>1:1000</b>         |
| Galactocerebroside                                | MilliporeSigma | MAB342     | AB_94857    |               | <b>1:200</b>          |
| EBP                                               | Santa Cruz     | sc-374267  | AB_11012162 | <b>1:500</b>  |                       |
| $\alpha$ -tubulin                                 | Cell Signaling | 3873S      | AB_1904178  | <b>1:1000</b> |                       |
| Anti-rabbit IgG, HRP-linked Antibody              | Cell Signaling | 7074S      | AB_2099233  | <b>1:1000</b> |                       |
| Anti-mouse IgG, HRP-linked Antibody               | Cell Signaling | 7076S      | AB_330924   | <b>1:1000</b> |                       |
| Goat anti-Rabbit IgG (H+L) - Alexa Fluor 594      | ThermoFisher   | A-11037    | AB_2534095  |               | <b>1:500</b>          |
| Goat anti-Rabbit IgG (H+L) - Alexa Fluor 647      | ThermoFisher   | A-21245    | AB_2535813  |               | <b>1:500</b>          |
| Goat anti-Rabbit IgG (H+L) - Alexa Fluor Plus 488 | ThermoFisher   | A32731     | AB_2633280  |               | <b>1:500</b>          |
| Goat anti-Mouse IgG (H+L) - Alexa Fluor 488       | ThermoFisher   | A-11029    | AB_2534088  |               | <b>1:500</b>          |
| Goat anti-Mouse IgG (H+L) - Alexa Fluor Plus 488  | ThermoFisher   | A32723     | AB_2633275  |               | <b>1:500</b>          |
| Goat anti-Mouse IgG (H+L) - Alexa Fluor Plus 647  | ThermoFisher   | A32728     | AB_2633277  |               | <b>1:500</b>          |
| Normal Rabbit IgG                                 | MilliporeSigma | 12-370     | AB_145841   |               | <b>1:800-1:1000</b>   |
| Normal Mouse IgG                                  | MilliporeSigma | 12-371     | AB_145840   |               | <b>1:200-1:1000</b>   |
| Rabbit IgG Isotype Control                        | ThermoFisher   | 31235      | AB_243593   |               | <b>1:1200-1:20000</b> |
| Mouse IgG Isotype Control                         | ThermoFisher   | 31903      | AB_10959891 |               | <b>1:2500</b>         |
